# Supplementary material for: Loss of Mpdz impairs ependymal cell integrity leading to perinatal‐onset hydrocephalus in mice
Source: PubMed Central journal article supplement (PMC5494508; doi:10.15252/emmm.201606430), 2017-05-12
Supplement: EMMM-9-890-s003.pdf [file EMMM-9-890-s003.pdf]

**Figure 1 B**

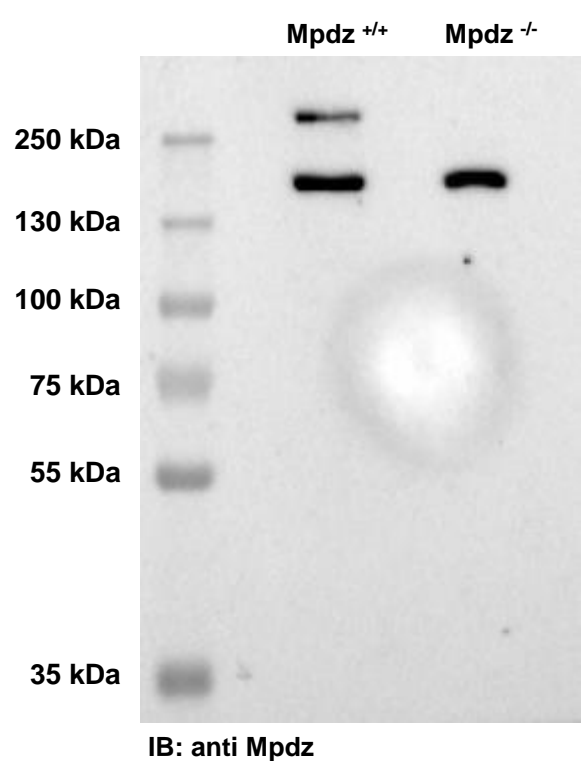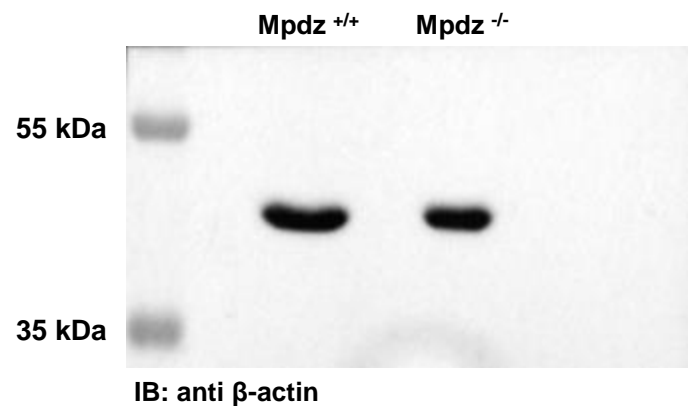

# Figure 1 D

*Mpdz<sup>fl/fl</sup>*      *Cre<sup>+</sup>  
Mpdz<sup>ΔΔ</sup>*

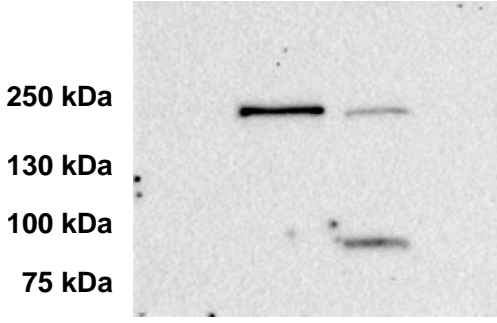

IB: anti Mpdz

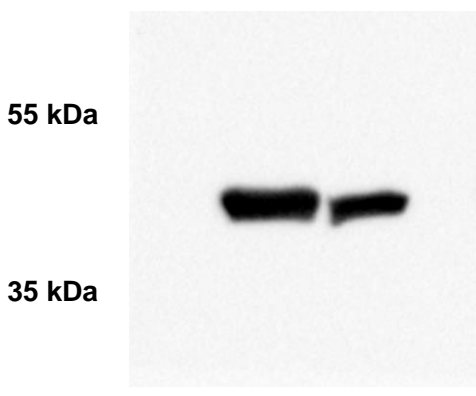

IB: anti  $\beta$ -actin
