# Supplementary material for: Loss of Mpdz impairs ependymal cell integrity leading to perinatal‐onset hydrocephalus in mice
Source: PubMed Central journal article supplement (PMC5494508; doi:10.15252/emmm.201606430), 2017-05-12
Supplement: EMMM-9-890-s004.pdf [file EMMM-9-890-s004.pdf]

# Figure 6 C

|                   | 72h    | 72h [%]  | Average  | SD       |
|-------------------|--------|----------|----------|----------|
| <b>si-control</b> | 24,817 | 100      | 100      | 0        |
|                   | 20,867 | 100      |          |          |
|                   | 38,119 | 100      |          |          |
|                   | 48,505 | 100      |          |          |
|                   | 26,497 | 100      |          |          |
| <b>si-MPDZ</b>    | 8,996  | 36,24935 | 54,53284 | 12,89514 |
|                   | 12,24  | 58,65721 |          |          |
|                   | 27,237 | 71,45256 |          |          |
|                   | 24,11  | 49,70622 |          |          |
|                   | 14,997 | 56,59886 |          |          |

|                   | 72h    | 72h [%]  | Average  | SD       |
|-------------------|--------|----------|----------|----------|
| <b>sh-control</b> | 50,758 | 100      | 100      | 0        |
|                   | 71,567 | 100      |          |          |
|                   | 27,36  | 100      |          |          |
| <b>sh-MPDZ</b>    | 15,674 | 30,87986 | 40,55056 | 23,15883 |
|                   | 17,029 | 23,79449 |          |          |
|                   | 18,325 | 66,97734 |          |          |

# Figure 6 E

|      | RhoA      | GAPDH     | RhoA/Gapdh | active RhoA | active RhoA/total RhoA |          |       |            |  |
|------|-----------|-----------|------------|-------------|------------------------|----------|-------|------------|--|
| WT-1 | 2.707.972 | 5.180.344 | 0,523      | 0,7525      | 1,440                  |          |       |            |  |
| KO-1 | 1.883.277 | 4.752.869 | 0,396      | 1,0875      | 2,745                  |          | mean  | SD         |  |
| WT-2 | 4.745.571 | 9.353.382 | 0,507      | 0,467       | 0,920                  | Mpdz +/+ | 1,191 | 0,26028954 |  |
| KO-2 | 1.246.451 | 4.721.354 | 0,264      | 0,8135      | 3,081                  | Mpdz -/- | 2,602 | 0,56451339 |  |
| WT-3 | 657.092   | 848.243   | 0,775      | 0,9405      | 1,214                  |          |       |            |  |
| KO-3 | 257.728   | 591.920   | 0,435      | 0,862       | 1,980                  |          |       |            |  |
